# Supplementary material for: In vivo Ebola virus infection leads to a strong innate response in circulating immune cells
Source: BMC Genomics. 2016 Sep 5;17(1):707. doi: 10.1186/s12864-016-3060-0 (PMC5011782; doi:10.1186/s12864-016-3060-0)
Supplement: Additional file 1: — 125 strongly upregulated genes in PBMCs in the macaque intramuscular Ebola dataset. For each gene, we report the log fold-changes at 4 and 7 days post-infection, the corresponding adjusted p-values and its functional category. (XLSX 20 kb) [file 12864_2016_3060_MOESM1_ESM.xlsx]

## Sheet: Sheet 1
gene_id	gene_name	logFC_day4	logFC_day7	FDR_day4	FDR_day7	function
ENSMMUG00000002853	CORO2A	4.32556	4.85242	2.90184e-14	9.44998e-19	Other
ENSMMUG00000014926	EPSTI1	3.77658	3.64759	3.33347e-13	1.05318e-13	Isgs
ENSMMUG00000017534	IFIT5	3.9385	3.08238	8.91598e-13	1.51521e-09	Isgs
ENSMMUG00000005150	CD163	5.0629	4.27247	7.46977e-12	3.15055e-10	Macrophage_receptors
ENSMMUG00000015329	MX1	4.89535	5.39994	7.46977e-12	4.99964e-15	Isgs
ENSMMUG00000022311	PLAC8	3.82981	4.37214	9.40753e-12	8.33051e-16	Other
ENSMMUG00000003202	IFIH1	3.45614	3.16916	1.46327e-11	4.42439e-11	Isgs
ENSMMUG00000012782	OAS1	5.24405	6.92577	6.986e-11	1.65594e-17	Isgs
ENSMMUG00000010314	HERC6	3.65673	4.94195	7.14024e-11	6.42691e-19	Isgs
ENSMMUG00000001000	KCTD14	6.73551	6.1999	7.14024e-11	1.44289e-10	Isgs
ENSMMUG00000004362	protein_coding_ENSMMUG00000004362	6.61729	7.26105	7.86375e-11	2.03425e-13	Other
ENSMMUG00000001819	ISG15	6.30937	8.41124	1.08989e-10	4.01714e-17	Isgs
ENSMMUG00000008505	OAS2	4.92843	5.4909	1.08989e-10	1.36555e-13	Isgs
ENSMMUG00000019716	protein_coding_ENSMMUG00000019716	3.27063	3.70844	1.20272e-10	3.58019e-14	Other
ENSMMUG00000004015	APOBEC3G	3.35078	4.33686	1.49879e-10	3.33503e-17	Immunity
ENSMMUG00000002653	HK3	3.15359	3.50134	1.7772e-10	1.6346e-13	Tissue_specific
ENSMMUG00000011720	SERPINB1	3.26429	3.4781	1.8528e-10	1.30724e-12	Neutrophils
ENSMMUG00000005455	RNF213	3.43345	3.56232	2.07469e-10	5.02465e-12	Isgs
ENSMMUG00000031100	MS4A4E	5.00145	5.92709	2.07469e-10	2.27784e-14	Other
ENSMMUG00000015968	CMPK2	4.99451	5.41889	2.40745e-10	1.32178e-12	Isgs
ENSMMUG00000022070	SIGLEC1	5.71942	7.63868	2.47316e-10	1.454e-16	Macrophage_receptors
ENSMMUG00000012442	DDX58	3.82697	4.2778	2.7294e-10	3.21326e-13	Isgs
ENSMMUG00000001050	APOL6	3.95113	3.96846	4.20409e-10	4.69866e-11	Isgs
ENSMMUG00000014755	DHX58	3.26843	4.21429	6.03918e-10	3.85793e-16	Isgs
ENSMMUG00000001880	DDX60	3.62186	4.31219	7.3753e-10	5.91167e-14	Isgs
ENSMMUG00000023668	FBXO6	3.20658	4.6404	1.3725e-09	6.9525e-19	Isgs
ENSMMUG00000010114	RIN2	4.69421	4.0214	1.39073e-09	2.7173e-08	Other
ENSMMUG00000008101	SPATS2L	3.33382	4.61333	1.57009e-09	3.89096e-17	Isgs
ENSMMUG00000007176	DYSF	6.25238	6.70677	1.72314e-09	2.61876e-11	Other
ENSMMUG00000015969	RSAD2	5.99875	6.79968	1.77982e-09	3.81e-12	Isgs
ENSMMUG00000009831	TBC1D2	3.05652	4.73056	1.90743e-09	9.77039e-21	Other
ENSMMUG00000022337	protein_coding_ENSMMUG00000022337	4.69203	5.73654	2.00381e-09	9.72732e-14	Other
ENSMMUG00000002674	protein_coding_ENSMMUG00000002674	3.70264	4.18845	2.57672e-09	3.06993e-12	Other
ENSMMUG00000007221	HMOX1	3.6193	3.71492	3.66782e-09	2.3493e-10	Immunity
ENSMMUG00000008191	FAM89A	3.08945	4.23979	3.92748e-09	2.2358e-16	Other
ENSMMUG00000005317	ADAM28	7.11603	3.75528	3.94798e-09	0.000397139	Other
ENSMMUG00000013014	IL1RN	5.12024	6.66026	8.56844e-09	1.02181e-13	Cytokines
ENSMMUG00000015091	VNN2	5.17554	6.08318	1.09565e-08	8.84963e-12	Other
ENSMMUG00000012535	MCEMP1	5.61447	8.16884	1.32051e-08	1.99326e-15	Other
ENSMMUG00000004185	IFIT2	5.96717	5.95175	1.32051e-08	2.52835e-09	Isgs
ENSMMUG00000003272	protein_coding_ENSMMUG00000003272	4.05445	5.40507	1.67114e-08	4.36379e-14	Other
ENSMMUG00000011454	IFI6	4.42636	5.88181	2.36925e-08	1.44833e-13	Isgs
ENSMMUG00000003138	P2RY6	5.88231	5.93908	2.51124e-08	3.19635e-09	Isgs
ENSMMUG00000002852	protein_coding_ENSMMUG00000002852	3.46266	3.24024	2.62678e-08	3.53325e-08	Other
ENSMMUG00000010316	HERC5	5.0936	5.7443	4.89853e-08	2.29904e-10	Isgs
ENSMMUG00000016897	SECTM1	4.39925	3.70094	6.65578e-08	1.08379e-06	Isgs
ENSMMUG00000018791	MOCOS	3.96611	3.96858	7.93466e-08	1.37026e-08	Other
ENSMMUG00000016848	SLCO4A1	4.62278	5.36911	9.41349e-08	1.44289e-10	Other
ENSMMUG00000002350	IFI44	4.33604	4.79373	9.5682e-08	8.73472e-10	Isgs
ENSMMUG00000023780	IFI27L1	6.66848	7.6063	1.24433e-07	7.5558e-10	Isgs
ENSMMUG00000004055	CD300LF	3.22615	4.0522	1.26076e-07	6.96445e-12	Other
ENSMMUG00000005001	IFIT3	4.84759	5.31031	2.99521e-07	5.23922e-09	Isgs
ENSMMUG00000022170	PFKFB2	3.62692	3.34857	3.5767e-07	5.72313e-07	Other
ENSMMUG00000018314	HRASLS2	4.45592	7.85133	4.17239e-07	3.54298e-19	Other
ENSMMUG00000020023	MR1	3.54592	3.46472	4.42018e-07	1.7347e-07	Immunity
ENSMMUG00000012177	ACSL1	3.90281	4.63527	5.68138e-07	8.35108e-10	Isgs
ENSMMUG00000021756	PLSCR1	3.72261	3.91022	6.48623e-07	3.71568e-08	Isgs
ENSMMUG00000030237	protein_coding_ENSMMUG00000030237	3.77347	4.82474	7.67661e-07	8.78113e-11	Other
ENSMMUG00000006568	BATF2	6.59968	6.80662	8.13095e-07	6.77885e-08	Isgs
ENSMMUG00000021759	TRIB1	3.18917	4.34628	8.54443e-07	6.42058e-12	Other
ENSMMUG00000006868	S100A9	4.51708	5.16045	8.69872e-07	6.15646e-09	Immunity
ENSMMUG00000004831	S100A8	4.52725	5.2078	1.11548e-06	6.8033e-09	Isgs
ENSMMUG00000013102	TRPM6	3.8029	3.22024	1.19256e-06	1.11732e-05	Other
ENSMMUG00000000662	GBP1	3.69249	3.82523	1.21722e-06	1.12721e-07	Isgs
ENSMMUG00000014670	PYGL	3.39179	3.54135	1.27443e-06	9.39717e-08	Bile_acid_metabolism
ENSMMUG00000022109	CD163L1	5.26563	4.58361	1.41981e-06	5.86327e-06	Macrophage_receptors
ENSMMUG00000032156	C3AR1	3.60786	4.66085	1.72193e-06	2.18913e-10	Complement
ENSMMUG00000004014	IRF7	3.31429	3.67889	1.77191e-06	2.17729e-08	Immune_tf
ENSMMUG00000015332	TMPRSS2	4.47149	6.30665	2.13896e-06	5.76238e-12	Other
ENSMMUG00000009602	XAF1	3.68531	3.25283	2.2224e-06	7.96131e-06	Isgs
ENSMMUG00000019304	IDO1	3.3152	5.3928	2.49922e-06	3.4789e-14	Isgs
ENSMMUG00000008680	KCNE1	6.10693	8.95151	2.86266e-06	1.53012e-11	Other
ENSMMUG00000020177	MS4A4A	5.09261	6.12892	2.86569e-06	6.67001e-09	Isgs
ENSMMUG00000001569	IFI44L	5.76065	5.34717	2.8919e-06	3.04719e-06	Isgs
ENSMMUG00000005318	ADAMDEC1	7.63443	7.72994	3.24793e-06	6.16012e-07	Isgs
ENSMMUG00000004175	TRPM2	3.56871	4.98715	3.34455e-06	3.84726e-11	Other
ENSMMUG00000016004	ACPP	3.42811	3.15846	3.35338e-06	5.0538e-06	Other
ENSMMUG00000001220	EMR1	3.75446	3.38074	3.6118e-06	8.21367e-06	Macrophage_receptors
ENSMMUG00000021909	TWIST2	4.27693	3.84681	3.73336e-06	9.30625e-06	Other
ENSMMUG00000008531	FCAR	4.33939	5.734	4.31919e-06	7.74889e-10	Macrophage_receptors
ENSMMUG00000016606	protein_coding_ENSMMUG00000016606	5.91874	6.35801	5.97293e-06	3.08956e-07	Other
ENSMMUG00000012618	SERPING1	6.27826	7.63247	6.90916e-06	9.39868e-09	Acute_phase
ENSMMUG00000003214	protein_coding_ENSMMUG00000003214	4.45118	6.21196	7.32523e-06	7.09223e-11	Other
ENSMMUG00000023315	BCL2L14	5.82561	5.77864	8.67124e-06	2.53802e-06	Isgs
ENSMMUG00000000687	ETV7	5.00314	4.95023	1.06802e-05	3.40423e-06	Isgs
ENSMMUG00000016347	TFEC	3.13809	3.48708	1.21504e-05	2.52289e-07	Isgs
ENSMMUG00000009851	CASP5	5.40514	5.85432	1.3103e-05	6.91915e-07	Apoptosis
ENSMMUG00000006151	FPR2	5.01803	5.42585	1.90391e-05	1.06186e-06	Immunity
ENSMMUG00000009246	IL18RAP	4.47694	3.81304	1.93106e-05	7.82765e-05	Cytokines
ENSMMUG00000006441	OASL	3.44744	4.39987	2.07853e-05	1.42208e-08	Isgs
ENSMMUG00000013920	TREM2	4.11651	6.28516	3.49486e-05	7.45478e-11	Immunity
ENSMMUG00000004084	GCH1	3.29682	3.46792	4.10631e-05	3.80744e-06	Isgs
ENSMMUG00000003215	RAB44	4.14683	6.38561	4.61652e-05	7.25874e-11	Other
ENSMMUG00000022850	PTX3	3.99083	5.1195	0.000106625	2.05011e-07	Immunity
ENSMMUG00000000023	PTGER2	3.18703	4.43854	0.000114824	1.27932e-08	Other
ENSMMUG00000021062	CD177	6.68151	7.47215	0.000124704	6.39653e-06	Neutrophils
ENSMMUG00000000729	C2	4.08533	3.39069	0.000125702	0.000542861	Acute_phase
ENSMMUG00000004177	protein_coding_ENSMMUG00000004177	5.57383	6.72108	0.000132856	6.74273e-07	Other
ENSMMUG00000019186	P2RY2	3.89232	4.41036	0.000166601	3.9727e-06	Other
ENSMMUG00000016671	GPR84	3.77428	7.19701	0.000268881	1.11095e-11	Other
ENSMMUG00000004489	MMP8	5.3491	5.95177	0.000381369	2.38058e-05	Neutrophils
ENSMMUG00000022284	RAB20	3.04457	4.65593	0.000484992	7.7611e-09	Other
ENSMMUG00000017533	IFIT1	3.21974	3.35148	0.000571604	9.16738e-05	Isgs
ENSMMUG00000021887	S100P	3.36137	5.15331	0.000578887	3.46217e-08	Immunity
ENSMMUG00000015089	VNN1	3.70516	5.27951	0.00059533	2.8924e-07	Immunity
ENSMMUG00000007917	CA4	5.22008	6.48264	0.00103115	1.55347e-05	Other
ENSMMUG00000013703	CLEC4D	4.70293	6.44326	0.00134967	4.32753e-06	Macrophage_receptors
ENSMMUG00000020176	MS4A6E	4.86344	6.2884	0.00157644	1.50664e-05	Other
ENSMMUG00000018925	TGM2	3.72726	5.46054	0.00166923	6.88397e-07	Immunity
ENSMMUG00000000672	protein_coding_ENSMMUG00000000672	5.13064	5.65811	0.00226531	0.000239422	Other
ENSMMUG00000015690	GPR97	3.19176	5.38044	0.00264356	8.02853e-08	Other
ENSMMUG00000017617	MAG	4.12343	3.53841	0.00267853	0.00501502	Other
ENSMMUG00000000880	SCIN	4.3197	6.46894	0.00311241	3.24804e-06	Other
ENSMMUG00000004903	ENPP2	4.25392	6.02338	0.00320858	7.89581e-06	Immunity
ENSMMUG00000016307	SLC2A5	3.71215	5.01794	0.00355335	1.60658e-05	Bile_acid_metabolism
ENSMMUG00000001766	pseudogene_ENSMMUG00000001766	6.06577	5.77757	0.00461622	0.00398593	Other
ENSMMUG00000002657	OLFM4	4.60525	8.10379	0.00676156	1.39778e-06	Neutrophils
ENSMMUG00000031200	protein_coding_ENSMMUG00000031200	3.71929	5.45469	0.0134225	6.78392e-05	Other
ENSMMUG00000009784	CCL8	4.15056	7.19397	0.0162352	8.22042e-06	Cytokines
ENSMMUG00000004830	S100A12	3.30035	5.69962	0.0239902	1.64339e-05	Immunity
ENSMMUG00000004008	SPATC1	5.73044	9.95488	0.0248829	2.88574e-08	Other
ENSMMUG00000016814	THBD	3.02501	3.88117	0.0260689	0.000927762	Coagulation
ENSMMUG00000019983	IL6	3.03315	5.67833	0.0273494	3.09916e-06	Cytokines
ENSMMUG00000017637	GSG1	3.86739	11.2744	0.029971	3.37054e-16	Other
ENSMMUG00000010927	TNFAIP6	4.04882	6.43291	0.0350807	0.000205052	Isgs
